# Supplementary material for: Reassortment compatibility between PB1, PB2, and HA genes of the two influenza B virus lineages in mammalian cells
Source: PubMed Central journal article supplement (PMC4897687; doi:10.1038/srep27480), 2016-06-08
Supplement: srep27480-s1.pdf [file srep27480-s1.pdf]

1  
2  
3  
4  
5  
6  
7  
8  
9  
10  
11  
12  
13  
14  
15  
16  
17  
18  
19  
20  
21  
22  
23

**Supplementary information**

**Reassortment compatibility between PB1, PB2, and HA genes of the two influenza B virus lineages in mammalian cells**

**Authors:** Jin Il Kim,<sup>1†</sup> Ilseob Lee,<sup>1†</sup> Sehee Park,<sup>1</sup> Joon-Yong Bae,<sup>1</sup> Kirim Yoo,<sup>1</sup> Philippe Lemey,<sup>2</sup> Mee Sook Park,<sup>1</sup> Jin-Won Song,<sup>1</sup> Sun-Ho Kee,<sup>1</sup> Ki-Joon Song,<sup>1</sup> and Man-Seong Park<sup>\*,1</sup>

Figure S1 Page 2

Figure S2 Page 4

24 Supplementary figures

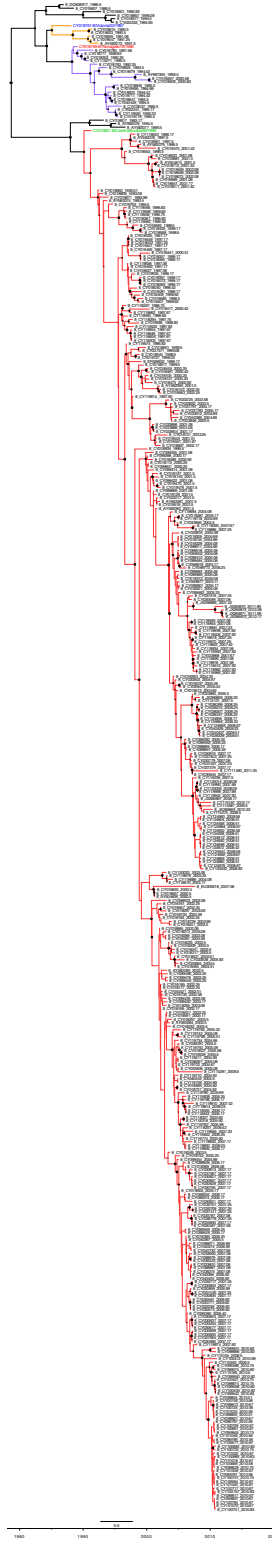

25

26 **fig. S1. Phylogenetic relationship of the NS gene segment of IBVs.** Phylogenetic  
27 relationship of the NS gene segment of IBVs (n = 431) were reconstructed using a time-  
28 resolved Bayesian evolution method. Colors represent different evolutionary lineages  
29 (Black, early strain circulating before Victoria and Yamagata lineage bifurcation; light  
30 orange, Victoria lineage; light purple, Yamagata lineage; and light red, Czechoslovakia  
31 lineage). A GenBank accession number was indicated for each gene sequence.

32

33

34

35

36

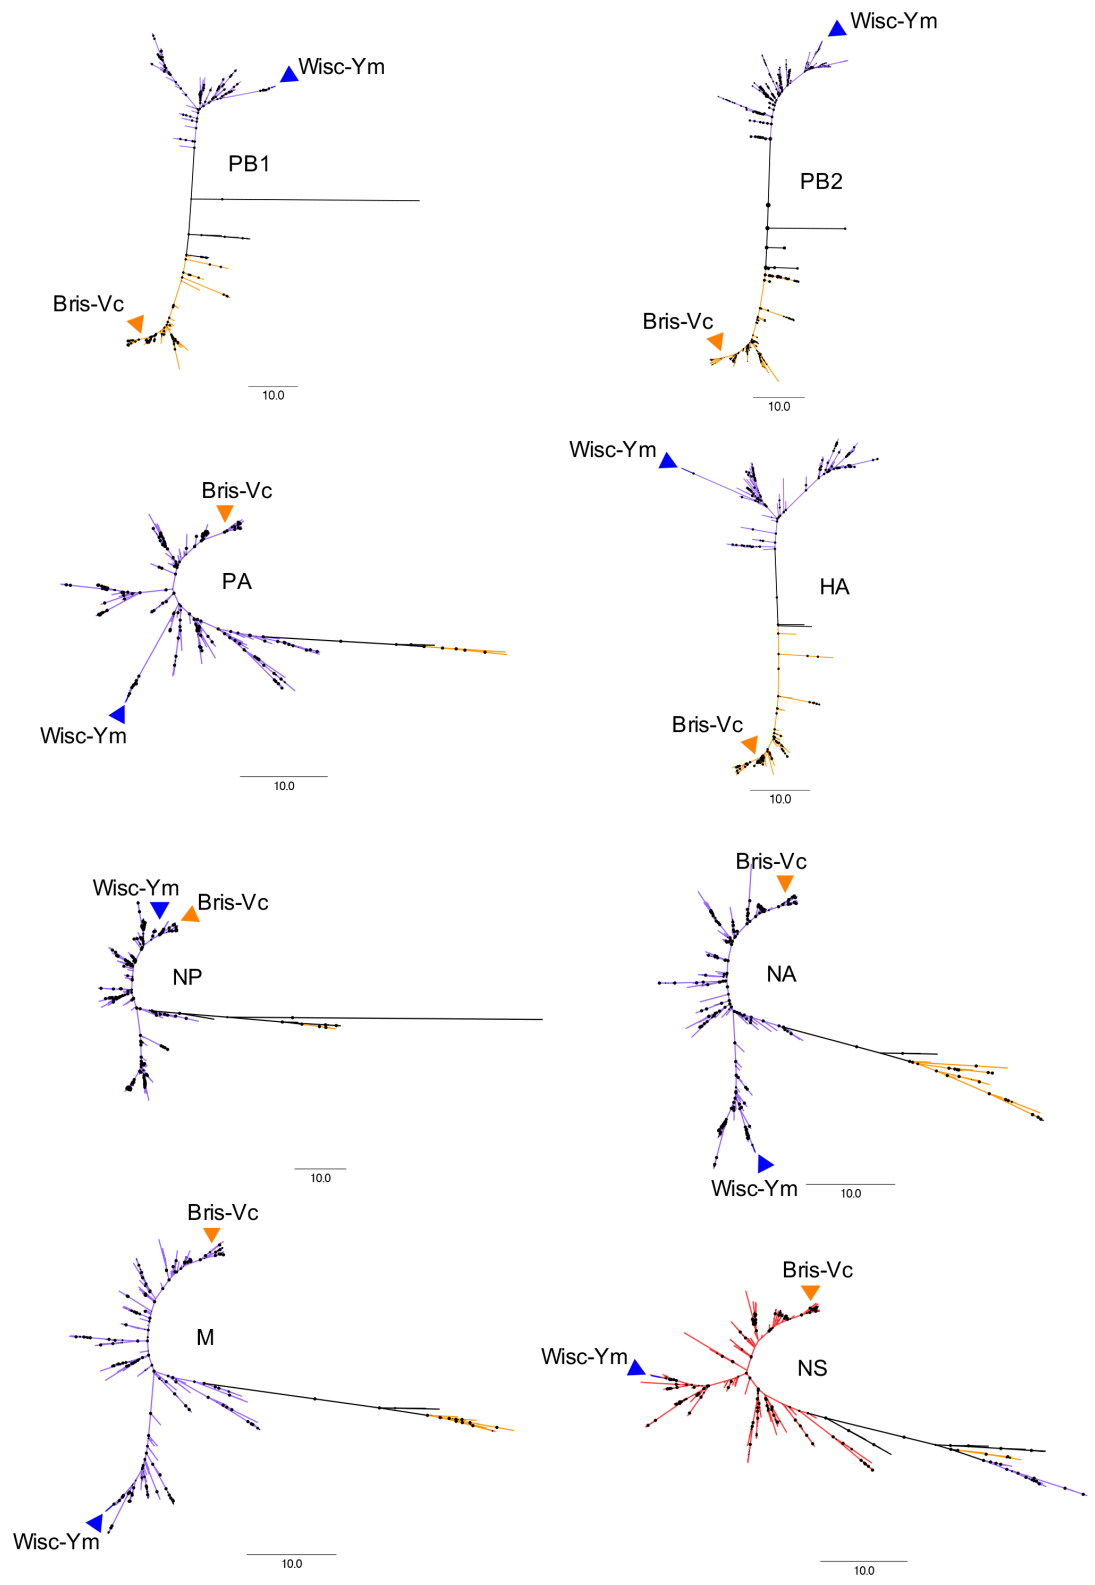

37

38

39 **fig. S2. Phylogenetic placements of each genetic segment of two IBV vaccine viruses.**

40 Phylogenetic locations of each genetic segment of two vaccine viruses (Victoria lineage

41 B/Brisbane/60/2008, Bris-Vc and Yamagata lineage B/Wisconsin/01/2010, Wisc-Ym)

42 that were used for polymerase activity and growth kinetics analyses were represented

43 using the same MCC trees of Fig. 1.
